# Supplementary material for: Insights into the dehydrogenation reaction process of a K-containing Mg(NH2)2–2LiH system
Source: Royal Society of Chemistry journal article supplement (doi:10.1039/c5dt03334a), 2015-01-01
Supplement: c5dt03334a1.pdf [file c5dt03334a1.pdf]

### Electronic Supplementary Information

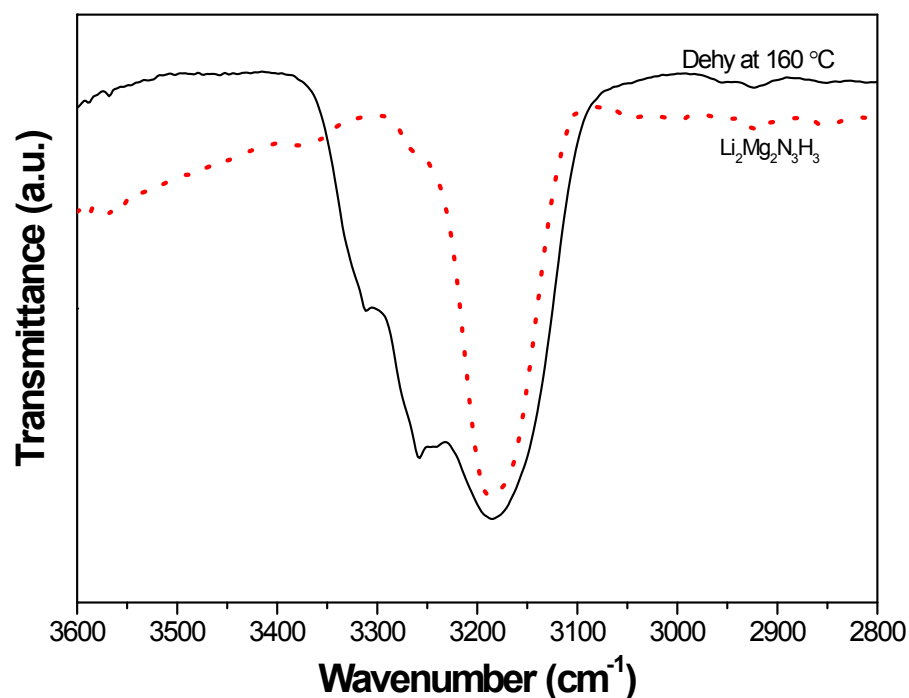

Figure S1 Comparison of the FTIR spectra for the Li<sub>2</sub>Mg<sub>2</sub>N<sub>3</sub>H<sub>3</sub> sample and the dehydrogenated Mg(NH<sub>2</sub>)<sub>2</sub>-2LiH-0.07KOH sample

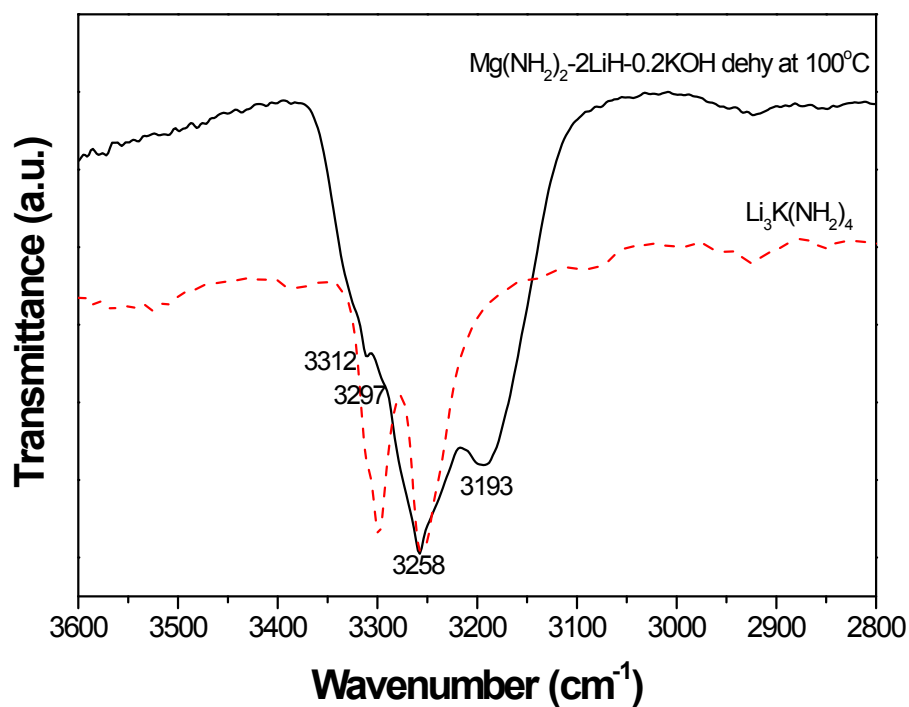

Figure S2 Comparison of the FTIR spectra for the Li<sub>3</sub>K(NH<sub>2</sub>)<sub>4</sub> sample and the dehydrogenated Mg(NH<sub>2</sub>)<sub>2</sub>-2LiH-0.2KOH sample

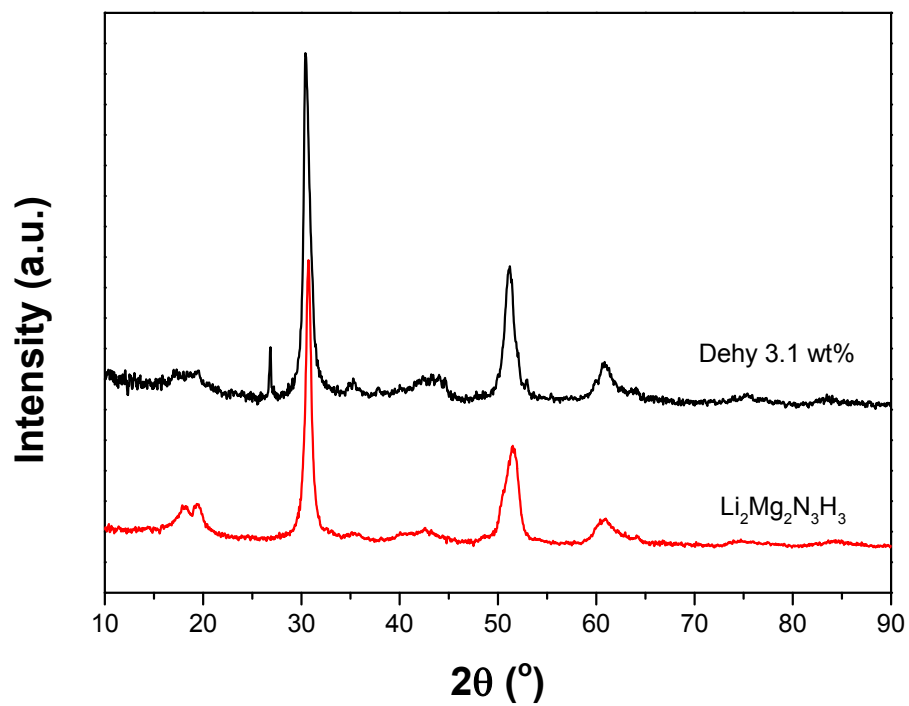

Figure S3 Comparison of the XRD patterns for the  $\text{Mg}(\text{NH}_2)_2\text{-}2\text{LiH}\text{-}0.07\text{KOH}$  sample after a 3.1 wt% hydrogen release and the  $\text{Li}_2\text{Mg}_2\text{N}_3\text{H}_3$  sample
